# Supplementary material
Source: PubMed Central journal article supplement (PMC2492616)
Supplement: pp.108.122713_1.pdf [file pp.108.122713_1.pdf]

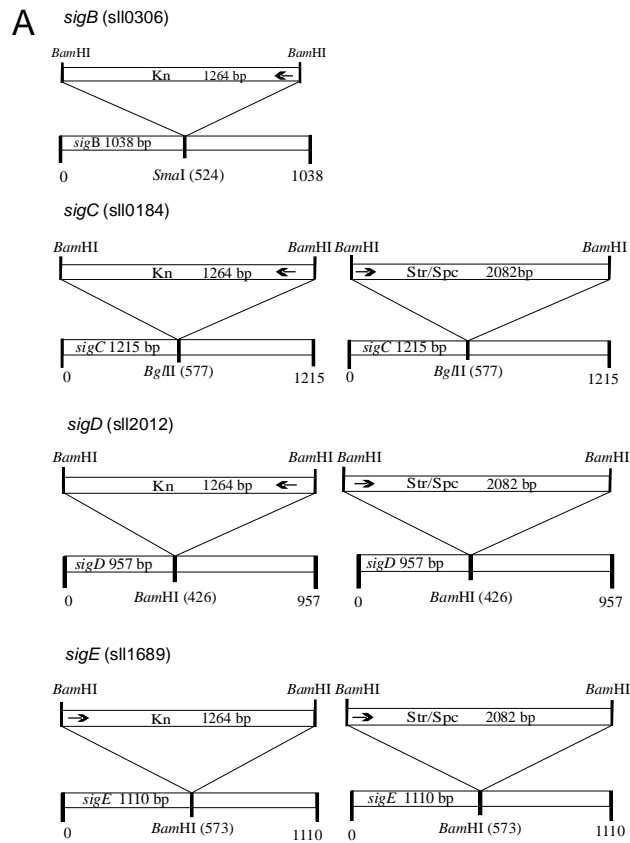

Supplement Figure S1. Sigma factor inactivation strains of *Synechocystis* sp. PCC 6803. Schematic representation inactivation strategies. Arrows indicate the orientation of the antibiotic resistance cassette.
