# Supplementary material
Source: PubMed Central journal article supplement (PMC2492616)
Supplement: pp.108.122713_4.pdf [file pp.108.122713_4.pdf]

Table S1. Similarity of RNA polymerase subunits in *Synechocystis* and *T. thermophilus*

|          | chain ID | gene name and ID code  | # of residues / included residues  |                               | model / template |
|----------|----------|------------------------|------------------------------------|-------------------------------|------------------|
| subunit  | 2A6E     | <i>Synechocystis</i>   | <i>Thermus thermophilus</i> / 2A6E | <i>Synechocystis</i> / models | % identity       |
| $\alpha$ | A / B    | <i>rpoA</i> (sll1818)  | 315 / 1-229                        | 314 / 1-230                   | 42.79            |
| $\beta$  | C        | <i>rpoB</i> (sll1787)  | 1119 / 1-1119                      | 1102 / 1-1082                 | 50.18            |
| $\beta'$ | D        | <i>rpoC2</i> (sll1789) | 1524 / 2-251, 364-1505             | 1317 / 1-340, 976-1257        | 49.28            |
| $\gamma$ |          | <i>rpoC1</i> (sll1265) |                                    | 626 / 1-626                   |                  |
| $\omega$ | E        | <i>rpoZ</i> (ssl2982)  | 96 / 2-96                          | 76 / -                        | 19.74            |
| $\sigma$ | F        | <i>sigA</i> (slr0653)  | 423 / 74-378, 384-423              | 425 / 66-425                  | 48.41            |
|          |          | <i>sigB</i> (sll0306)  |                                    | 345 / 30-345                  | 41.77            |
|          |          | <i>sigC</i> (sll0184)  |                                    | 404 / 44-404                  | 39.71            |
|          |          | <i>sigD</i> (sll2012)  |                                    | 318 / 1-318                   | 39.94            |
|          |          | <i>sigE</i> (sll1689)  |                                    | 369 / 52-369                  | 39.62            |
